# Supplementary material for: Maternal Vitamin B12 Status During Pregnancy and Its Association With Outcomes of Pregnancy and Health of the Offspring: A Systematic Review and Implications for Policy in India
Source: PubMed Central journal article supplement (PMC8074968; doi:10.3389/fendo.2021.619176), 2021-04-12
Supplement: Table_1.pdf [file Table_1.pdf]

**Supplementary Table – 1 Indian studies on B12 during pregnancy and anemia**

| <b>Macrocytosis with anaemia (2 studies)</b> |                                                                                                                                 |                            |                                                                                                                                    |                                              |                                                                                                                                                                                                                                                                   |
|----------------------------------------------|---------------------------------------------------------------------------------------------------------------------------------|----------------------------|------------------------------------------------------------------------------------------------------------------------------------|----------------------------------------------|-------------------------------------------------------------------------------------------------------------------------------------------------------------------------------------------------------------------------------------------------------------------|
| <b>Sl. No.</b>                               | <b>Paper/ Author/ Year</b>                                                                                                      | <b>Exposure</b>            | <b>Test/Procedure</b>                                                                                                              | <b>Outcomes</b>                              | <b>Results</b>                                                                                                                                                                                                                                                    |
| 1                                            | Anemia of pregnancy in northern India. Nature and therapeutic follow-up<br><br>Khanna et al., 1977 (25)                         | Pregnancy                  | 114 anaemic pregnant women                                                                                                         | Anemia                                       | Megaloblastosis occurred in more than half<br><br>Vitamin B12-deficiency was fairly common<br>All patients with normoblastic marrow achieved full remission with iron therapy alone<br><br>The deficiency of haematinic factors was largely due to poor nutrition |
| 2                                            | Clinical evaluation of severe anemia in pregnancy with special reference to macrocytic anemia<br><br>Tripathi et al., 2012 (26) | Severe anemia in pregnancy | All antenatal patients presenting with severe anemia (hemoglobin <7gm%) over a period of 2years from January 2008 to December 2009 | Haematological profile of women with anaemia | High prevalence of macrocytic anemia (40%)<br><br>The maternal and fetal morbidity and mortality is higher in macrocytic anemia as compared to iron-deficiency anemia                                                                                             |

**Supplementary Table – 2 Indian studies on B12 during pregnancy and maternal pregnancy complications**

| <b>Maternal pregnancy complications (7) studies</b> |                                                                                                                                    |                                                                                                                      |                                                                                                                                                                                                                                           |                 |                                                                                                                                                                                     |
|-----------------------------------------------------|------------------------------------------------------------------------------------------------------------------------------------|----------------------------------------------------------------------------------------------------------------------|-------------------------------------------------------------------------------------------------------------------------------------------------------------------------------------------------------------------------------------------|-----------------|-------------------------------------------------------------------------------------------------------------------------------------------------------------------------------------|
| <b>Sl. No.</b>                                      | <b>Paper/ Author/ Year</b>                                                                                                         | <b>Exposure</b>                                                                                                      | <b>Study design, Subjects, Test/Procedure</b>                                                                                                                                                                                             | <b>Outcomes</b> | <b>Results</b>                                                                                                                                                                      |
| 1                                                   | Association of omega-3 fatty acids and homocysteine concentrations in pre-eclampsia<br><br>Kulkarni et al., 2011 (29)              | Maternal folate, vitamin B <sub>12</sub> , omega-3 fatty acids and homocysteine levels measured just before delivery | Case control design<br>49 Pre-eclamptic and 57 normotensive women.                                                                                                                                                                        | Pre-eclampsia   | Homocysteine concentrations were higher in pre-eclamptic than in normotensive women (14.28 vs 11.03umol/L, p<0.01) despite similar levels of folic acid and vitamin B <sub>12</sub> |
| 2                                                   | Study of Serum Homocysteine, Folic Acid and Vitamin B <sub>12</sub> in Patients with Preeclampsia<br><br>Mujawar et al., 2011 (30) | Occurrence of association between homocysteine, folic acid and vitamin B12                                           | Fifty preeclamptic patients from gynecology ward were studied for estimation of serum homocysteine, folic acid and vitamin B12<br>Control group consist of 50 healthy normotensive pregnant subjects of identical age without any disease | Preeclampsia    | Preeclampsia group had higher homocysteine(16.4vs 8.19umol/L, p<0.001) lower B12 (321 vs 391 pg/ml, p<0.001) and folate levels compared to the control group.                       |

|   |                                                                                                                                                                                  |                                                                                                                             |                                                                                                                                                                                                          |                                                                                                      |                                                                                                                                                                                                                                                                                                                                                                                                        |
|---|----------------------------------------------------------------------------------------------------------------------------------------------------------------------------------|-----------------------------------------------------------------------------------------------------------------------------|----------------------------------------------------------------------------------------------------------------------------------------------------------------------------------------------------------|------------------------------------------------------------------------------------------------------|--------------------------------------------------------------------------------------------------------------------------------------------------------------------------------------------------------------------------------------------------------------------------------------------------------------------------------------------------------------------------------------------------------|
| 3 | <p>Reduced Folate, Increased Vitamin B 12 and Homocysteine Concentrations in Women Delivering Preterm</p> <p>Dhobale et al., 2012 (31)</p>                                       | <p>Maternal levels of folate, vitamin B 12 and homocysteine in mothers just before delivery</p>                             | <p>Case control design. 76 women delivering at term (control group), 67 women delivering preterm (PT group) and 49 women with preeclampsia delivering preterm (PT-PE group) with singleton pregnancy</p> | <p>Preterm delivery, Preterm delivery due to preeclampsia or Term delivery in normotensive women</p> | <p>Increased vitamin B 12 and homocysteine levels were seen in the PT-PE and PT groups as compared to the controls.</p> <p>Reduced folate levels were observed in the PT group</p> <p>A negative association of maternal plasma Homocysteine with birth weight was seen in the PT group (<math>r=-0.3</math>)</p>                                                                                      |
| 4 | <p>MTHFR C677T polymorphism, folate, vitamin B12 and homocysteine in recurrent pregnancy losses: a case control study among North Indian women</p> <p>Puri et al., 2013 (27)</p> | <p>Maternal Methylenetetrahydrofolate reductase genotype (MTHFR C677T) in relation to homocysteine, B12, folate levels.</p> | <p>107 women with three or more consecutive unexplained recurrent pregnancy losses and 343 women with two or more successful and uncomplicated pregnancies</p>                                           | <p>Recurrent pregnancy losses</p>                                                                    | <p>MTHFR genotypic distribution among cases and controls showed no significant difference</p> <p>MTHFR C677T polymorphism was found to be significantly associated with increased homocysteine in the case group. Hyperhomocysteinemia (OR = 7.02, 95%CI 3.8 – 12.8) and vitamin B<sub>12</sub> deficiency (OR=16.39, 95%CI 7.7 – 34.8) were significant risk factors for recurrent pregnancy loss</p> |

|   |                                                                                                                                     |                                                                                |                                                                                                                                                                                                                                        |                                          |                                                                                                                                                                                                                                                                                                                                                                                                                                                             |
|---|-------------------------------------------------------------------------------------------------------------------------------------|--------------------------------------------------------------------------------|----------------------------------------------------------------------------------------------------------------------------------------------------------------------------------------------------------------------------------------|------------------------------------------|-------------------------------------------------------------------------------------------------------------------------------------------------------------------------------------------------------------------------------------------------------------------------------------------------------------------------------------------------------------------------------------------------------------------------------------------------------------|
| 5 | <p>Recurrent pregnancy losses vis-à-vis anemia and vitamin (Folate/B12) imbalance</p> <p>Kaur et al., 2018 (28)</p>                 | <p>Anemia, folate and B12 imbalance</p>                                        | <p>Case control study of 105 women with history of Idiopathic recurrent pregnancy loss and 135 Multiparous non pregnant women with 2 or more consecutive normal obstetric outcomes from a tertiary hospital setting in North India</p> | <p>Recurrent pregnancy losses (RPL)</p>  | <p>Controls had folate deficiency anemia while non anaemic women with RPL had higher vitamin B12 deficiency (58%)</p> <p>Non anemic RPL women had lowest B12/folate ratio (18.46 vs 124 in anemic controls, <math>p&lt;0.001</math>)</p> <p>A higher allelic frequency for C677T allele was observed (0.16 versus 0.11) in the case group</p>                                                                                                               |
| 6 | <p>Higher maternal plasma folate, vitamin B12 and homocysteine levels in women with preeclampsia</p> <p>Pisal et al., 2019 (32)</p> | <p>Maternal plasma folate, vitamin B12 and homocysteine levels at delivery</p> | <p>Case control study on 450 normotensive control and 350 women with preeclampsia from tertiary hospital in Pune</p> <p>Preeclampsia defined as systolic and diastolic blood pressures greater than 140 and 90 mmHg, with</p>          | <p>Preeclampsia and preterm delivery</p> | <p>Maternal vitamin B12, folate, deficiency was higher in the preeclampsia group as compared to the control group (41% vs 60%, <math>p&lt;0.05</math>). Women with preeclampsia and preterm delivery had higher B12 and lower homocysteine.</p> <p>Higher maternal homocysteine was associated with higher maternal systolic (<math>r=0.15</math>, <math>p&lt;0.001</math>) and diastolic (<math>r=0.2</math>, <math>p&lt;0.001</math>) blood pressure.</p> |

|   |                                                                                                                                              |                                                                                              |                                                                                                                                                                     |                                                                   |                                                                                                                                                                                                                                                                                                                                                                                            |
|---|----------------------------------------------------------------------------------------------------------------------------------------------|----------------------------------------------------------------------------------------------|---------------------------------------------------------------------------------------------------------------------------------------------------------------------|-------------------------------------------------------------------|--------------------------------------------------------------------------------------------------------------------------------------------------------------------------------------------------------------------------------------------------------------------------------------------------------------------------------------------------------------------------------------------|
|   |                                                                                                                                              |                                                                                              | presence of proteinuria                                                                                                                                             |                                                                   |                                                                                                                                                                                                                                                                                                                                                                                            |
| 7 | <p>Low plasma vitamin B12 in pregnancy is associated with gestational 'diabetes' and later diabetes</p> <p>Krishnaveni et al., 2009 (18)</p> | Maternal homocysteine, Vitamin B12, and folate concentration in third trimester of pregnancy | <p>654 women from Mysore Parthenon cohort study assessed at 30 weeks' gestation on 100gm oral glucose tolerance test. Retested by OGTT after 5 year of delivery</p> | Gestational Diabetes and Diabetes mellitus 5 years after delivery | <p>B12 deficient women had higher incidence of GDM (OR = 2.1 95%CI 1.1, 3.6, adjusted for maternal body size, socioeconomic factors, familial risk of diabetes). Among B12 deficient women incidence of GDM increased with increasing folate concentrations (5.4% to 10.9%). B12 deficiency during pregnancy was associated with increased diabetes prevalence 5 years after delivery.</p> |

**Supplementary Table – 3 Indian studies on B12 during pregnancy and congenital anomalies**

| <b>Offspring outcomes at birth: congenital anomalies* (6 studies)</b> |                                                                                                                                                                                                       |                                                                                       |                                                                                                                                                         |                                 |                                                                                                                                                                                                                                                                                                                 |
|-----------------------------------------------------------------------|-------------------------------------------------------------------------------------------------------------------------------------------------------------------------------------------------------|---------------------------------------------------------------------------------------|---------------------------------------------------------------------------------------------------------------------------------------------------------|---------------------------------|-----------------------------------------------------------------------------------------------------------------------------------------------------------------------------------------------------------------------------------------------------------------------------------------------------------------|
| <b>Sl. No.</b>                                                        | <b>Paper/ Author/ Year</b>                                                                                                                                                                            | <b>Exposure</b>                                                                       | <b>Test/Procedure</b>                                                                                                                                   | <b>Outcomes</b>                 | <b>Results</b>                                                                                                                                                                                                                                                                                                  |
| 1                                                                     | Evaluation of the levels of folate, vitamin B12, homocysteine and fluoride in the parents and the affected neonates with neural tube defect and their matched controls<br><br>Ratan et al., 2008 (34) | Folate, vitamin B12, and homocysteine levels in parents and neonates                  | Case control study in 35 neonates with NTD and their parents, 31 neonates with congenital anomalies and 24 neonates with no anomalies from north India. | Neural Tube Defects in Neonates | Neonates with NTD had higher homocysteine (17.9 $\mu$ mol/L vs 11.9 $\mu$ mol/L, p=0.02)<br><br>Lower RBC folate in mothers had higher odds for NTD (OR = 23.3, 95%CI 2.6-207.7)<br><br>High homocysteine in fathers was identified as an independent risk factor for NTD (adjusted OR = 26.5, 95%CI 2.6-262.4) |
| 2                                                                     | Folate supplementation, MTHFR gene polymorphism and neural tube defects: a community based case control study in North India<br><br>Deb et al., 2011 (35)                                             | Potential role of MTHFR gene polymorphism, folate supplementation and dietary pattern | Mothers of NTD neonates (n=222) and controls (n=111) in heterogeneous populations of North India, with the                                              | NTD                             | Not receiving folate supplements and vegetarian diet in mothers was associated with increased risk for NTD (OR = 1.92,                                                                                                                                                                                          |

|   |                                                                                                                            |                                                     |                                                                                                                                                                                   |                                                                                                                                                                              |                                                                                                                                                                                                                                                                                                                                                                               |
|---|----------------------------------------------------------------------------------------------------------------------------|-----------------------------------------------------|-----------------------------------------------------------------------------------------------------------------------------------------------------------------------------------|------------------------------------------------------------------------------------------------------------------------------------------------------------------------------|-------------------------------------------------------------------------------------------------------------------------------------------------------------------------------------------------------------------------------------------------------------------------------------------------------------------------------------------------------------------------------|
|   |                                                                                                                            |                                                     | special focus on their ethnic labels                                                                                                                                              |                                                                                                                                                                              | 95%CI 1.09-3.4 & OR = 1.77, 95%CI .02-3.05 respectively)                                                                                                                                                                                                                                                                                                                      |
| 3 | Maternal one-carbon metabolism, MTHFR and TCN2 genotypes and neural tube defects in India<br><br>Godbole et al., 2011 (37) | Mothers of offspring with NTD and healthy controls  | Multicentric study of 318 women with NTD-affected offspring (cases) and 702 women with apparently healthy offspring (controls). Antenatal confirmation of NTD by fetal ultrasound | Comparison of plasma folate, vitamin B (12), homocysteine and holo-transcobalamin levels, and polymorphisms in methylenetetrahydrofolate reductase and transcobalamin levels | Cases (NTD) had significantly lower maternal holo-transcobalamin and higher maternal homocysteine levels. Prevalence of holo-transcobalamin was reported to be 65.3% vs 55.2% in NTD versus controls (p=0.003).<br><br>1298A>C and 1781G>A polymorphisms in MTHFR were protective<br><br>Maternal 776C>G polymorphism in TCN2 was strongly predictive of NTD in the offspring |
| 4 | Maternal hyperhomocysteinemia and congenital heart defects: A                                                              | Maternal serum homocysteine levels measured 9 to 15 | Case control study of 30 women with neonates with congenital heart                                                                                                                | Congenital heart disease in their offspring                                                                                                                                  | 46.6% cases had a tHcy level more than 15µmol/l compared                                                                                                                                                                                                                                                                                                                      |

|   |                                                                                                                                                          |                                                                         |                                                                                                                                                                                                                                                                             |                               |                                                                                                                                                                                                                   |
|---|----------------------------------------------------------------------------------------------------------------------------------------------------------|-------------------------------------------------------------------------|-----------------------------------------------------------------------------------------------------------------------------------------------------------------------------------------------------------------------------------------------------------------------------|-------------------------------|-------------------------------------------------------------------------------------------------------------------------------------------------------------------------------------------------------------------|
|   | prospective case control study in Indian population.<br><br>Malik et al., 2017 (38)                                                                      | months after delivery                                                   | disease and 20 control women with healthy neonates                                                                                                                                                                                                                          |                               | to 15% control mothers.                                                                                                                                                                                           |
| 5 | Risk factors for orofacial clefts in India: A case-control study<br><br>Neogi et al., 2017 (39)                                                          | Folic acid supplementation during the peri-conceptual period            | 785 participants were included in the study (157 cases and 628 controls)                                                                                                                                                                                                    | Orofacial clefts in offspring | Exclusive vegetarianism in mothers associated with OFC (adjusted OR, 4.47; 95% CI, 1.83–10.98). Folic acid supplementation with folic acid during first 3 months of pregnancy was not protective.                 |
| 6 | Homocysteine and vitamin B12: Other causes of neural tube defects in Eastern Uttar Pradesh and Western Bihar population<br><br>Gupta R et al., 2018 (36) | Maternal and neonate's folic acid, homocysteine, and vitamin B12 levels | Retrospective Case control study<br><br>96 mothers who either had a first NTD child or had a history of NTD child in the family and 126 neonates with spina bifida from eastern India.<br><br>84 control mothers whose previous and current pregnancies were normal, and 87 | Risk of development of NTDs   | Folic acid level in the mothers and neonates was within the normal limit<br><br>NTD mothers had significantly raised homocysteine (14.57 vs 4.4 umol/L p<0.001) and low B12 levels (191.8 vs 478 pg/ml, p=0.002). |



|  |  |  |                                                                                                                                                  |  |  |
|--|--|--|--------------------------------------------------------------------------------------------------------------------------------------------------|--|--|
|  |  |  | control neonates who had no defects and were within the same age range as the cases<br>Samples in neonates collected within 1 to 4 weeks of life |  |  |
|--|--|--|--------------------------------------------------------------------------------------------------------------------------------------------------|--|--|

**Supplementary Table – 4 Indian studies on B12 during pregnancy and birth size**

| <b>Offspring outcomes at birth: birth size* (10 studies)</b> |                                                                                                                                                                             |                                                       |                                                                                                                                                                                        |                                                                            |                                                                                                                                                                                                                                                                                                                                                                              |
|--------------------------------------------------------------|-----------------------------------------------------------------------------------------------------------------------------------------------------------------------------|-------------------------------------------------------|----------------------------------------------------------------------------------------------------------------------------------------------------------------------------------------|----------------------------------------------------------------------------|------------------------------------------------------------------------------------------------------------------------------------------------------------------------------------------------------------------------------------------------------------------------------------------------------------------------------------------------------------------------------|
| <b>Sl. No.</b>                                               | <b>Paper/ Author/ Year</b>                                                                                                                                                  | <b>Exposure</b>                                       | <b>Test/Procedure</b>                                                                                                                                                                  | <b>Outcomes</b>                                                            | <b>Results</b>                                                                                                                                                                                                                                                                                                                                                               |
| 1                                                            | Intake of micronutrient-rich foods in rural Indian mothers is associated with the size of their babies at birth: Pune Maternal Nutrition Study<br><br>Rao et al., 2001 (41) | Maternal dietary intakes of macro and micro nutrients | Prospective study of 797 rural Indian women from Western India (Pune). Maternal dietary intakes assessed by 24-h recall and food frequency questionnaire at 18 & 28 weeks of gestation | Birth size (Birth weight, length, head circumference, skin fold thickness) | Birth size was strongly associated with the consumption of milk at wk 18 and of green leafy vegetables (B=19.4, p<0.001) and fruits at wk 28 of gestation<br>Erythrocyte folate at 28 wk gestation was positively associated with birth weight. (Associations adjusted for gender, gestational age, social class, pre pregnancy weight, energy intake and physical activity) |
| 2                                                            | Maternal total homocysteine                                                                                                                                                 | Maternal circulating concentrations of total          | Mothers of full term small for gestation age (SGA)                                                                                                                                     | Offspring birth weight                                                     | Mothers of SGA babies had higher plasma tHcy                                                                                                                                                                                                                                                                                                                                 |

|   |                                                                                                           |                                                                      |                                                                                                                                                                   |                                                                                                               |                                                                                                                                                                                                                                                                                                                                                                                                        |
|---|-----------------------------------------------------------------------------------------------------------|----------------------------------------------------------------------|-------------------------------------------------------------------------------------------------------------------------------------------------------------------|---------------------------------------------------------------------------------------------------------------|--------------------------------------------------------------------------------------------------------------------------------------------------------------------------------------------------------------------------------------------------------------------------------------------------------------------------------------------------------------------------------------------------------|
|   | concentration and neonatal size in India<br><br>Yajnik CS et al., 2005 (49)                               | homocysteine (tHcy), vitamin B12 and folate at 28 weeks of pregnancy | babies (n=30) and appropriate for gestational age babies (n=50) selected from the Pune Maternal Nutrition Study Cohort.                                           |                                                                                                               | concentration at 28wks gestation, than AGA babies(7.2 vs 5.5 umol/L, p<0.01).<br>Higher plasma tHcy concentrations were significantly associated with lower maternal B12 levels and lower birth weight (r=-0.28, p<0.05 adjusted for gender, maternal height and gestational weight at delivery)                                                                                                       |
| 3 | The relationship of neonatal serum vitamin B12 status with birth weight<br><br>Muthayya et al., 2006 (43) | Maternal B12 during each trimesters of pregnancy and Cord B12 levels | 410 women completed study with known pregnancy outcome. 112 women with live births and B12 measurements at each trimester and Cord B12 included in this analysis. | Birth weight. Offspring categorised into 3 groups based on birth wt (<2500 gms, upto 2999 gms and > 3000 gms) | B12 concentration in mothers during pregnancy correlated positively with cord values. Cord B12 was associated with birth weight upto 40 wks gestation (r=-0.3, p=0.01) . The associations were strongest for second and third trimester. Neonates in birth weight categories (<2500gms and 2500-2999gms) had lower cord B12 values than the group with birth weight >3000gms (Mean difference 52pg/ml) |
| 4 | Low maternal vitamin B12 status is associated with                                                        | Maternal sociodemographic, anthropometric, dietary                   | Prospective observational study from Bangalore. 478 mothers recruited at first                                                                                    | Birth weight in 377 live births<br>Prevalence of IUGR                                                         | 28.6% of new born were IUGR                                                                                                                                                                                                                                                                                                                                                                            |

|   |                                                                                                                                                                                                                            |                                                                                                                                                                                             |                                                                                                                                                                                                                                                                                                                |                                                                                                                                 |                                                                                                                                                                                                                                                                                                                                                     |
|---|----------------------------------------------------------------------------------------------------------------------------------------------------------------------------------------------------------------------------|---------------------------------------------------------------------------------------------------------------------------------------------------------------------------------------------|----------------------------------------------------------------------------------------------------------------------------------------------------------------------------------------------------------------------------------------------------------------------------------------------------------------|---------------------------------------------------------------------------------------------------------------------------------|-----------------------------------------------------------------------------------------------------------------------------------------------------------------------------------------------------------------------------------------------------------------------------------------------------------------------------------------------------|
|   | <p>intrauterine growth retardation in urban South Indians</p> <p>Muthayya et al., 2006 (48)</p>                                                                                                                            | <p>and micronutrient status in apparently healthy pregnant women</p>                                                                                                                        | <p>trimester of pregnancy and followed up at every trimester. Dietary intake assessed on food frequency questionnaire. Erythrocyte folate levels.</p>                                                                                                                                                          | <p>- birth weight below the 10th centile of the gestational age according to the standards of the World Health Organization</p> | <p>Women in Lowest tertile of Vitamin B12 levels had highest odds for higher prevalence of IUGR in all trimesters. Effect was most pronounced in second trimester (OR = 9.28, 95%CI 2.9-29.68) adjusted for age, education, first trimester weight, parity). There was no association with erythrocyte folate.</p>                                  |
| 5 | <p>High folate and low vitamin B-12 intakes during pregnancy are associated with small-for-gestational age infants in South Indian women: a prospective observational cohort study</p> <p>Dwarkanath et al., 2013 (50)</p> | <p>Dietary intake of B12 and total folate and folic acid supplementation during pregnancy. Ratio of vitamin B-12 intake to total folate intake (folic acid supplement + dietary folate)</p> | <p>Prospective observational cohort study of 1838 pregnant women aged 17–40 y and at &lt; 13 wk of gestation</p> <p>Dietary intake of B12 and total folate and folic acid supplementation during pregnancy. at baseline and in the 2 &amp; 3rd trimester</p> <p>Anthropometric measurements of the infants</p> | <p>Outcomes in small for- gestational-age (SGA) infants</p>                                                                     | <p>Low B12 and folate dietary intakes were associated with higher risk for Small for Gestational Age babies (SGA) (RR=1.2). In a subgroup of women that received high folate supplements (&gt;1000mcg/d) during second trimester the lowest tertile of B12 to folate intake ratio had highest risk for SGA babies (RR=2.73, 95%CI: 1.17, 6.37).</p> |
| 6 | <p>Maternal homocysteine in pregnancy and offspring birth weight:</p>                                                                                                                                                      | <p>Maternal total homocysteine</p>                                                                                                                                                          | <p>Tested for evidence of causality within a Mendelian randomization framework, using a</p>                                                                                                                                                                                                                    | <p>Offspring birth weight in the Pune Maternal Nutrition Study and Parthenon Cohort Study</p>                                   | <p>Offspring birth weight was inversely related to maternal homocysteine concentration adjusted for gestational age and offspring</p>                                                                                                                                                                                                               |

|   |                                                                                                                                                 |                                                                             |                                                                                                                                                                                                                                        |                                                                                                                                                                                                    |                                                                                                                                                                                                                                                                                                                                                                                                                      |
|---|-------------------------------------------------------------------------------------------------------------------------------------------------|-----------------------------------------------------------------------------|----------------------------------------------------------------------------------------------------------------------------------------------------------------------------------------------------------------------------------------|----------------------------------------------------------------------------------------------------------------------------------------------------------------------------------------------------|----------------------------------------------------------------------------------------------------------------------------------------------------------------------------------------------------------------------------------------------------------------------------------------------------------------------------------------------------------------------------------------------------------------------|
|   | <p>epidemiological associations and Mendelian randomization analysis</p> <p>Yajnik CS et al., 2014 (44)</p>                                     |                                                                             | <p>methylenetetrahydrofolatereductase (MTHFR) gene variant rs1801133 (earlier known as 677C→T) by instrumental variable and triangulation analysis, separately and using meta-analysis</p>                                             |                                                                                                                                                                                                    | <p>gender (B=-40, 95%CI: -62, -17)</p> <p>Maternal risk genotype at rs1801133 predicted higher homocysteine concentration and lower birth weight (B=-61, 95%CI: -111, -10) (adjusted for gestational age, offspring gender and rs1801133 genotype)</p> <p>Instrumental variable and triangulation analysis supported a causal association between maternal homocysteine concentration and offspring birth weight</p> |
| 7 | <p>Imbalance of folic acid and vitamin B12 is associated with birth outcome: an Indian pregnant women study</p> <p>Gadgil et al., 2014 (22)</p> | <p>maternal plasma folate, vitamin B12 during pregnancy and their ratio</p> | <p>Observational study on 49 full-term pregnant women at a tertiary center in Pune. Concentrations of folate, B12 and homocysteine measured at 36 weeks gestation.</p> <p>Neonatal anthropometry was measured within 24 h of birth</p> | <p>Neonatal anthropometry (birth weight, length, head circumference, abdominal circumference, mid arm circumference, chest circumference, triceps skinfold and subscapular skinfold thickness)</p> | <p>Maternal folate and B12 levels were not associated with neonatal anthropometry.</p> <p>Folate to B12 ratio was negatively correlated with homocysteine, birth weight (p=0.009), length, head and chest circumference.</p>                                                                                                                                                                                         |

|    |                                                                                                                                                                       |                                                                     |                                                                                                                                                                                                                                                                                                                                     |                                                                                                   |                                                                                                                                                                                                                                                                                                                                                                                                                   |
|----|-----------------------------------------------------------------------------------------------------------------------------------------------------------------------|---------------------------------------------------------------------|-------------------------------------------------------------------------------------------------------------------------------------------------------------------------------------------------------------------------------------------------------------------------------------------------------------------------------------|---------------------------------------------------------------------------------------------------|-------------------------------------------------------------------------------------------------------------------------------------------------------------------------------------------------------------------------------------------------------------------------------------------------------------------------------------------------------------------------------------------------------------------|
| 8  | <p>Association of homocysteine with global DNA methylation in vegetarian Indian pregnant women and neonatal birth anthropometrics</p> <p>Gadgil et al., 2014 (70)</p> | <p>Plasma maternal folate, vitamin B-12 and homocysteine levels</p> | <p>49 participants having completed <math>\geq 36</math> weeks of pregnancy were enrolled in the study</p>                                                                                                                                                                                                                          | <p>Maternal global DNA methylation and neonatal anthropometrics (within 24 hours after birth)</p> | <p>No difference in global DNA methylation was found between the vegetarian and non-vegetarian pregnant women</p> <p>Plasma total homocysteine of the vegetarian group showed significant correlation to global DNA methylation</p> <p>Plasma total homocysteine was inversely related to tricep skinfold and chest circumference (<math>r=-0.39</math>, <math>p=0.04</math>) of neonates in vegetarian group</p> |
| 9  | <p>A prospective study of maternal fatty acids, micronutrients and homocysteine and their association with birth outcome</p> <p>Wadhvani et al., 2015 (23)</p>        | <p>Levels of maternal folate, vitamin B12 and homocysteine</p>      | <p>106 women with normal pregnancy from tertiary hospital in Pune (total gestation <math>&gt;37</math> weeks and baby weight <math>&gt;2.5</math> kg and having no medical or obstetrical complications). Followed up every trimester starting from 16-20 weeks of gestation. Fasting blood samples obtained at every trimester</p> | <p>Birth outcome – Birth weight and chest circumference</p>                                       | <p>Maternal plasma folate at first and third trimester and B12 at third trimester was positively associated (<math>r=0.22</math>) while maternal homocysteine at first trimester was negatively associated (<math>r=-0.25</math>) with birth weight</p>                                                                                                                                                           |
| 10 | <p>Trends of folate, vitamin B12, and homocysteine levels</p>                                                                                                         | <p>Maternal vitamin B<sub>12</sub>, folate and</p>                  | <p>Prospective follow up of 100 women with</p>                                                                                                                                                                                                                                                                                      | <p>Adverse pregnancy outcomes (abortion, gestational diabetes,</p>                                | <p>Hyperhomocysteinemia in first trimester was associated with adverse pregnancy</p>                                                                                                                                                                                                                                                                                                                              |

|  |                                                                                                    |                                             |                                                                                                                                                                                                                       |                                                                            |                                                                                                                                |
|--|----------------------------------------------------------------------------------------------------|---------------------------------------------|-----------------------------------------------------------------------------------------------------------------------------------------------------------------------------------------------------------------------|----------------------------------------------------------------------------|--------------------------------------------------------------------------------------------------------------------------------|
|  | <p>in different trimesters of pregnancy and pregnancy outcomes</p> <p>Mishra et al., 2020 (42)</p> | <p>homocysteine levels during pregnancy</p> | <p>pregnancy without complications</p> <p>Biochemical investigations (plasma homocysteine, folate, and vitamin B<sub>12</sub> levels) were performed on all pregnant women in first, second, and third trimesters</p> | <p>hypertension, premature rupture of membranes) and low birth weight.</p> | <p>outcomes (OR = 3.62). Vitamin B12 deficiency in first trimester was associated with low birth weight babies (OR = 8.09)</p> |
|--|----------------------------------------------------------------------------------------------------|---------------------------------------------|-----------------------------------------------------------------------------------------------------------------------------------------------------------------------------------------------------------------------|----------------------------------------------------------------------------|--------------------------------------------------------------------------------------------------------------------------------|

**Supplementary Table – 5 Indian studies on B12 during pregnancy and offspring biochemistry**

| <b>Later life health outcomes in the offspring: Vitamin B12 status in offspring* (3 studies)</b> |                                                                                                                                        |                                                                                                          |                                                                                                    |                                                              |                                                                                                                                                                                                                                                                                                                                                       |
|--------------------------------------------------------------------------------------------------|----------------------------------------------------------------------------------------------------------------------------------------|----------------------------------------------------------------------------------------------------------|----------------------------------------------------------------------------------------------------|--------------------------------------------------------------|-------------------------------------------------------------------------------------------------------------------------------------------------------------------------------------------------------------------------------------------------------------------------------------------------------------------------------------------------------|
| <b>Sl. No.</b>                                                                                   | <b>Paper/ Author/ Year</b>                                                                                                             | <b>Exposure</b>                                                                                          | <b>Test/Procedure</b>                                                                              | <b>Outcomes</b>                                              | <b>Results</b>                                                                                                                                                                                                                                                                                                                                        |
| 1                                                                                                | Child's homocysteine concentration at 2 years is influenced by pregnancy vitamin B12 and folate status<br><br>Lubree et al., 2012 (51) | Maternal B12, folate and homocysteine concentrations at 28 and 34 weeks pregnancy                        | 118 rural and urban women attending a tertiary care center in Pune. Offspring measured at 2 years. | Offspring B12, folate, homocysteine concentration at 2 years | Higher child vitamin B12 at 2y was associated with pregnancy vitamin B12 at 34 weeks (B=0.2, p=0.02 adjusted for current diet, breast feeding, cord B12 and folate)<br><br>Child's 2y tHcy concentration was associated with lower pregnancy vitamin B12 at 34 weeks (B=-0.2, p=0.02 adjusted for current diet, breast feeding, cord B12 and folate). |
| 2                                                                                                | Contribution of Food Sources to the Vitamin B12 Status of South Indian Children from a Birth Cohort Recruited in the City of Mysore    | Dietary intake of B12 rich foods in mothers during pregnancy and B12 concentrations at 28 week pregnancy | Children from the Mysore Parthenon Birth Cohort (n=512, 47.1% male)                                | Plasma B12 concentrations in the offspring at 9.5 years      | Maternal pregnancy plasma B12 was associated with child's plasma B12 concentrations at 9.5 years (B=0.22, 95%CI                                                                                                                                                                                                                                       |

|   |                                                                                                             |                                                                                                    |                                                                                                                          |                                      |                                                                                                                                                                                                                                                                                                                                                                                                                                                                                                                   |
|---|-------------------------------------------------------------------------------------------------------------|----------------------------------------------------------------------------------------------------|--------------------------------------------------------------------------------------------------------------------------|--------------------------------------|-------------------------------------------------------------------------------------------------------------------------------------------------------------------------------------------------------------------------------------------------------------------------------------------------------------------------------------------------------------------------------------------------------------------------------------------------------------------------------------------------------------------|
|   | Christian et al., 2015<br>(52)                                                                              |                                                                                                    |                                                                                                                          |                                      | 0.14, 0.3 adjusted for current dietary intakes)                                                                                                                                                                                                                                                                                                                                                                                                                                                                   |
| 3 | Vitamin B12 status in pregnant women and their infants in South India<br><br>Finkelstein et al 2017<br>(21) | Maternal B12 status at 14 weeks gestation and markers of B12 deficiency (MMA, homocysteine levels) | 77 infants born to mothers who participated in an RCT and received 50mcg B12 or placebo starting from 14 weeks gestation | Infant B12 concentrations at 6 weeks | 44% Infants were B12 deficient. Impaired B12 status (low maternal B12 and high MMA) in pregnancy was associated with higher infant B12 levels at 6 weeks (adjusted for B12 intervention). The strongest associations were associated with values in the third trimester (p<0.01). Infants born to women with vitamin B12 deficiency had a twofold greater risk of vitamin B12 deficiency (P<0.01). Higher maternal folate concentrations also predicted lower risk of vitamin B12 deficiency in infants (P<0.05). |



**Supplementary table -6 Indian studies on B12 during pregnancy and metabolic and cardiovascular outcomes**

| <b>Later life health outcomes in the offspring: metabolic and cardiovascular outcomes* (5 studies)</b> |                                                                                                                                                                          |                                                                                          |                                                                                                                                                                                                                                                                                                  |                                                                                                                                                   |                                                                                                                                                                                                                                                                                                          |
|--------------------------------------------------------------------------------------------------------|--------------------------------------------------------------------------------------------------------------------------------------------------------------------------|------------------------------------------------------------------------------------------|--------------------------------------------------------------------------------------------------------------------------------------------------------------------------------------------------------------------------------------------------------------------------------------------------|---------------------------------------------------------------------------------------------------------------------------------------------------|----------------------------------------------------------------------------------------------------------------------------------------------------------------------------------------------------------------------------------------------------------------------------------------------------------|
| <b>Sl. No.</b>                                                                                         | <b>Paper/ Author/ Year</b>                                                                                                                                               | <b>Exposure</b>                                                                          | <b>Subjects/Procedure</b>                                                                                                                                                                                                                                                                        | <b>Outcomes</b>                                                                                                                                   | <b>Results</b>                                                                                                                                                                                                                                                                                           |
| 1                                                                                                      | Bone mass in Indian children--relationships to maternal nutritional status and diet during pregnancy: the Pune Maternal Nutrition Study<br><br>Ganpule et al., 2006 (53) | Vitamin B12, red cell folate and homocysteine measurements at 18 and 28 weeks pregnancy. | 695 offspring from Pune Maternal Nutrition Study cohort and their parents                                                                                                                                                                                                                        | Total body and total spine bone mineral content and density (BMD) measure in offspring at 6 years of age by Dual energy Xray Absorptiometry (DXA) | Maternal red cell folate at 28 wks was associated with total (B=0.13, p<0.01) and spine (B=0.17p<0.001) bone mineral density, adjusted for parental size and body fat mass.                                                                                                                              |
| 2                                                                                                      | Vitamin B12 and folate concentrations during pregnancy and insulin resistance in the offspring: the Pune Maternal Nutrition Study<br><br>Yajnik CS et al., 2008 (19)     | Maternal vitamin B12, folate and tHcy status = at 18 and 28 weeks of pregnancy           | 700 women pregnant women and their offspring from the Pune Maternal Nutrition Study Cohort<br><br>Offspring assessed at 6 years for anthropometry, body composition (dual-energy X-ray absorptiometry scan) and insulin resistance (homeostatic model assessment of insulin resistance [HOMA-R]) | Offspring adiposity and insulin resistance at 6 years                                                                                             | Higher maternal erythrocyte folate concentrations at 28 weeks was associated with higher offspring adiposity and higher HOMA-R (B=0.38, p<0.001)<br>Low maternal vitamin B12 (18 weeks) predicted higher HOMA-R (B=-0.16, p=0.03) in the children<br><br>Offspring of mothers with a combination of high |

|   |                                                                                                                                                                         |                                                                                                                                        |                                                                                                                                             |                                                                                                                                                         |                                                                                                                                                                                                                                                                                                                                                                                                                     |
|---|-------------------------------------------------------------------------------------------------------------------------------------------------------------------------|----------------------------------------------------------------------------------------------------------------------------------------|---------------------------------------------------------------------------------------------------------------------------------------------|---------------------------------------------------------------------------------------------------------------------------------------------------------|---------------------------------------------------------------------------------------------------------------------------------------------------------------------------------------------------------------------------------------------------------------------------------------------------------------------------------------------------------------------------------------------------------------------|
|   |                                                                                                                                                                         |                                                                                                                                        |                                                                                                                                             |                                                                                                                                                         | folate and low vitamin B12 concentrations were the most insulin resistant                                                                                                                                                                                                                                                                                                                                           |
| 3 | <p>Low maternal vitamin B12 status during pregnancy is associated with reduced heart rate variability indices in young children.</p> <p>Sucharita et al., 2014 (56)</p> | <p>Mother's vitamin B12 levels during first trimester of pregnancy divided into groups higher and lower B12 based on median value.</p> | <p>79 healthy children whose mothers had been recruited during pregnancy as part of cohort studies from tertiary hospital in Bangalore.</p> | <p>Cardiac autonomic nervous activity in children using heart rate variability (HRV) indices, measured between 3 to 8 years of age.</p>                 | <p>53% reduction in the HRV measured in the low-frequency bands</p> <p>Significant association between low -frequency and total power HRV with cord blood vitamin B12 levels (<math>\rho = 0.31</math> and <math>0.30</math>).</p>                                                                                                                                                                                  |
| 4 | <p>Association between maternal folate concentrations during pregnancy and insulin resistance in Indian children</p> <p>Krishnaveni et al., 2014 (54)</p>               | <p>Maternal homocysteine, Vitamin B12, and folate concentration in third trimester of pregnancy</p>                                    | <p>654 women from Mysore Parthenon cohort study assessed at 30 weeks gestation and their offspring assessed at 5, 9.5 and 13.5 years.</p>   | <p>Birth weight, current glucose and insulin resistance.</p> <p>Analysis adjusted for GDM, maternal and child body size, child B12, folate status).</p> | <p>Maternal homocysteine concentrations were inversely associated with all neonatal anthropometric measurements, and positively associated with glucose concentrations in the children at 5 years (B=0.17, p=0.007)</p> <p>Higher maternal folate concentrations were associated with higher HOMA-IR in the children at 9.5 age (B=0.1, 95%CI 0.01. 0.2, p=0.03). There were no associations with maternal B12.</p> |

|   |                                                                                                                                                                |                                                              |                                                                                                                                                                                                                                                                                                                                                                                                 |                                                                       |                                                                                                                                                                                                                                                                                   |
|---|----------------------------------------------------------------------------------------------------------------------------------------------------------------|--------------------------------------------------------------|-------------------------------------------------------------------------------------------------------------------------------------------------------------------------------------------------------------------------------------------------------------------------------------------------------------------------------------------------------------------------------------------------|-----------------------------------------------------------------------|-----------------------------------------------------------------------------------------------------------------------------------------------------------------------------------------------------------------------------------------------------------------------------------|
| 5 | <p>Maternal B12, Folate and Homocysteine Concentrations and Offspring Cortisol and Cardiovascular Responses to Stress</p> <p>Krishnaveni et al., 2020 (55)</p> | <p>Maternal B12, folate, homocysteine at 30 wk pregnancy</p> | <p>264 adolescents from the Mysore Parthenon cohort study assessed at 13.6 years of age on the Trier Social Stress Test for Children</p> <p>Baseline and poststress salivary cortisol concentrations, heart rate, blood pressure, stroke volume, cardiac output, and total peripheral resistance were measured continuously at baseline, during TSST-C, and for 10 minutes after the TSST-C</p> | <p>Offspring cortisol and cardiovascular responses to stress test</p> | <p>Maternal low B12 status (plasma B12 &lt; 150 pmol/L) was associated with greater cortisol responses to stress in the offspring (B=0.36, 95%CI 0.16, 0.57). Higher homocysteine concentrations were associated with greater offspring heart rate response (B=0.13, p=0.01).</p> |
|---|----------------------------------------------------------------------------------------------------------------------------------------------------------------|--------------------------------------------------------------|-------------------------------------------------------------------------------------------------------------------------------------------------------------------------------------------------------------------------------------------------------------------------------------------------------------------------------------------------------------------------------------------------|-----------------------------------------------------------------------|-----------------------------------------------------------------------------------------------------------------------------------------------------------------------------------------------------------------------------------------------------------------------------------|

**Supplementary Table – 7 Indian studies on B12 during pregnancy and offspring cognitive outcomes**

| <b>Later life health outcomes in the offspring: cognitive outcomes (3 studies)</b> |                                                                                                                                                                                                                      |                                                                          |                                                                                                                                                                                                                                                                                                             |                                                   |                                                                                                                                                                                                                                    |
|------------------------------------------------------------------------------------|----------------------------------------------------------------------------------------------------------------------------------------------------------------------------------------------------------------------|--------------------------------------------------------------------------|-------------------------------------------------------------------------------------------------------------------------------------------------------------------------------------------------------------------------------------------------------------------------------------------------------------|---------------------------------------------------|------------------------------------------------------------------------------------------------------------------------------------------------------------------------------------------------------------------------------------|
| <b>Sl. No.</b>                                                                     | <b>Paper/ Author/ Year</b>                                                                                                                                                                                           | <b>Exposure</b>                                                          | <b>Test/Procedure</b>                                                                                                                                                                                                                                                                                       | <b>Outcomes</b>                                   | <b>Results</b>                                                                                                                                                                                                                     |
| 1                                                                                  | Vitamin B12 status of pregnant Indian women and cognitive function in their 9-year-old children<br><br>Bhate et al., 2008 (58)                                                                                       | Maternal plasma vitamin B12 status during pregnancy                      | Cognitive scores in offspring were compared between two groups chosen based on maternal B12 status during pregnancy (highest and lowest decile of B12 levels) from the PMNS cohort (n=108). Cognitive test included Coloured Progressive Matrices, Colour trails (A&B), Visual recognition test, Digit Span | Child's cognitive function at 9 years of age      | Offspring of mothers in lowest decile of B12 had poorer performance on Digit span (Attention) and Color trails A test (executive function)                                                                                         |
| 2                                                                                  | Higher Maternal Plasma Folate but Not Vitamin B-12 Concentrations during Pregnancy Are Associated with Better Cognitive Function Scores in 9- to 10- Year-Old Children in South India<br><br>Veena et al., 2010 (59) | Maternal folate, vitamin B-12 and homocysteine during 30 weeks pregnancy | 536 children (aged 9–10 y) from the Mysore Parthenon birth cohort Outcome measured on the Kaufman Assessment Battery                                                                                                                                                                                        | Offspring cognitive function at 9.5 years of age. | Children's cognitive test scores increased by 0.1–0.2 per SD increase across the entire range of maternal folate concentrations (adjusted for gender, age of child, socio-economic factors and child's current folate, B12 levels) |

|   |                                                                                                                                             |                                                                              |                                                                                                                                                                                                                                                                                                |                                                                          |                                                                                                                                                                                                                                                                                                                                      |
|---|---------------------------------------------------------------------------------------------------------------------------------------------|------------------------------------------------------------------------------|------------------------------------------------------------------------------------------------------------------------------------------------------------------------------------------------------------------------------------------------------------------------------------------------|--------------------------------------------------------------------------|--------------------------------------------------------------------------------------------------------------------------------------------------------------------------------------------------------------------------------------------------------------------------------------------------------------------------------------|
|   |                                                                                                                                             |                                                                              |                                                                                                                                                                                                                                                                                                |                                                                          | There were no associations of maternal B12 and homocysteine with offspring cognitive scores.                                                                                                                                                                                                                                         |
| 3 | Vitamin B12 and folate during pregnancy and offspring motor, mental and social development at 2 years of age<br><br>Bhate et al., 2012 (57) | Maternal B12 and folate status during pregnancy at 28 and 34 weeks gestation | Mothers (n = 123) and their offspring (62 girls, 61 boys) from rural and middle-class urban communities in and around Pune city were followed through pregnancy up to 2 y<br>Outcomes assessed on the Developmental Assessment Scale for Indian Infants and the Vineland Social Maturity Scale | Offspring motor, mental and social development at two years of age (2 y) | Motor development at 2yrs was associated with maternal folate during pregnancy (r=0.2).<br><br>Mental and Social development quotient were positively associated with maternal B12 and 28 weeks (B=0.27) and folate at 28 and 34 weeks (B=0.2)<br><br>All associations were independent of child's B12 and folate status at 2 years. |

**Supplementary table – 8 Studies from India on supplementation of B12 and/or multiple micronutrients or micronutrient rich food during pregnancy and maternal and child outcomes**

| <b>Supplementation studies ( 7 studies)</b> |                                                                                                                                                                                                  |                                                                                                                                                  |                                                                                                                                                   |                                                                                                   |                                                                                                                                                                                                                                                                                                                                                                                                                            |
|---------------------------------------------|--------------------------------------------------------------------------------------------------------------------------------------------------------------------------------------------------|--------------------------------------------------------------------------------------------------------------------------------------------------|---------------------------------------------------------------------------------------------------------------------------------------------------|---------------------------------------------------------------------------------------------------|----------------------------------------------------------------------------------------------------------------------------------------------------------------------------------------------------------------------------------------------------------------------------------------------------------------------------------------------------------------------------------------------------------------------------|
| <b>Sl. No.</b>                              | <b>Paper/ Author/ Year</b>                                                                                                                                                                       | <b>Subjects and timing of intervention</b>                                                                                                       | <b>Dose and type of intervention</b>                                                                                                              | <b>Outcomes</b>                                                                                   | <b>Results</b>                                                                                                                                                                                                                                                                                                                                                                                                             |
| 1                                           | Multi micronutrient supplementation for undernourished pregnant women and the birth size of their offspring: a double-blind, randomized, placebo-controlled trial<br><br>Gupta et al., 2007 (40) | 200 pregnant undernourished women (BMI<18.5kg/m <sup>2</sup> and/or Hb 7 to 9 gm%) in their second trimester from tertiary hospital in New Delhi | Randomized to receive micronutrient supplementation (29 vitamins and minerals including 1mcg B12) or placebo from second trimester till delivery. | Birth size of their offspring, incidence of low-birth-weight infants and early neonatal morbidity | Infants in the micronutrient group were heavier by 98 g (adjusted p =0.09) and measured 0.80 (p=0.04) cm longer and 0.20 cm (p=0.02) larger in midarm circumference compared with the placebo group<br><br>Incidence of LBW declined from 43.1% to 16.2% (adjusted RR=0.3, 95%CI 0.13,0.71) with multi micronutrient supplementation and early neonatal morbidity declined from 28.0% to 14.8% (RR=0.42, 95%CI 0.19, 0.94) |

|   |                                                                                                                                                                                      |                                                                                                                                                   |                                                                                                                                                                |                                                                        |                                                                                                                                                                                                                                                                                                                                                                                                                                                                                                                                                                                 |
|---|--------------------------------------------------------------------------------------------------------------------------------------------------------------------------------------|---------------------------------------------------------------------------------------------------------------------------------------------------|----------------------------------------------------------------------------------------------------------------------------------------------------------------|------------------------------------------------------------------------|---------------------------------------------------------------------------------------------------------------------------------------------------------------------------------------------------------------------------------------------------------------------------------------------------------------------------------------------------------------------------------------------------------------------------------------------------------------------------------------------------------------------------------------------------------------------------------|
| 2 | <p>Vitamin B-12 Supplementation during Pregnancy and Early Lactation Increases Maternal, Breast Milk, and Infant Measures of Vitamin B-12 Status</p> <p>Duggan et al., 2014 (47)</p> | <p>Intervention in pregnancy from first trimester (&lt;14 weeks gestation) till 6 weeks postpartum in women from lower SES in urban Bangalore</p> | <p>Randomized, placebo-controlled clinical trial. (n=183 in each group)</p> <p>50mcg oral B12 or placebo. Both groups received Iron-Folic acid supplements</p> | <p>Maternal, breast milk and infant concentrations of vitamin B-12</p> | <p>Compared with placebo vitamin B-12–supplemented women had significantly higher plasma vitamin B-12 concentrations at both 2nd &amp; 3rd trimesters and at 6 weeks postpartum (136 vs 87pM).</p> <p>In a subset of infants tested at 6 weeks of age, in the supplemented group, median plasma vitamin B-12 concentration was higher (199 vs 139pM), plasma methylmalonic acid and Hcy concentrations were significantly lower</p> <p>No difference in birth weight between the groups (2.85 ± 0.46 kg in the vitamin B-12 group vs. 2.83 ± 0.45 kg in the placebo group )</p> |
| 3 | <p>Improving women’s diet quality pre-conceptionally and during gestation:</p>                                                                                                       | <p>Preconceptional intervention</p>                                                                                                               | <p>Non-blinded, individually randomized controlled trial</p>                                                                                                   | <p>Birth weight (LBW)<br/>Secondary birth outcomes were</p>            | <p>There was no overall increase in birth weight</p>                                                                                                                                                                                                                                                                                                                                                                                                                                                                                                                            |

|   |                                                                                                                                                                                                                        |                                                                                                                                                                                                                                                    |                                                                                                                                                                                                                                                                                                                            |                                                                                              |                                                                                                                                                                                                                                                                                                                                          |
|---|------------------------------------------------------------------------------------------------------------------------------------------------------------------------------------------------------------------------|----------------------------------------------------------------------------------------------------------------------------------------------------------------------------------------------------------------------------------------------------|----------------------------------------------------------------------------------------------------------------------------------------------------------------------------------------------------------------------------------------------------------------------------------------------------------------------------|----------------------------------------------------------------------------------------------|------------------------------------------------------------------------------------------------------------------------------------------------------------------------------------------------------------------------------------------------------------------------------------------------------------------------------------------|
|   | <p>effects on birth weight and prevalence of low birth weight—a randomized controlled efficacy trial in India (Mumbai Maternal Nutrition Project)</p> <p>Potdar et al., 2014 (45)</p>                                  | <p>Total randomized women 6512, live births – 1962, outcome measurements on – 1360 newborn. Subjects from Mumbai urban slums</p> <p>Intervention started more than 90 days before pregnancy till delivery.</p>                                     | <p>Intervention group received daily snack – ‘samosa’ made from green leafy vegetables, fruit, and milk. Control group received a daily low-micronutrient vegetable snack (potato and onion)</p>                                                                                                                           | <p>gestational age, small for gestational age, other new born anthropometry measurements</p> | <p>in the intervention group. In new-borns whose mothers started supplementation &gt;90 days before pregnancy, birth weight was higher in the treatment group by 48gms. There was a significant interaction with maternal pre-pregnancy BMI. Mothers in supplementation group with higher pre pregnancy BMI had higher birth weight.</p> |
| 4 | <p>A Daily Snack Containing Leafy Green Vegetables, Fruit, and Milk before and during Pregnancy Prevents Gestational Diabetes in a Randomized, Controlled Trial in Mumbai, India</p> <p>Sahariah et al., 2016 (33)</p> | <p>Preconceptional intervention</p> <p>Total randomized women 6512, live births – 1962, outcome measurements on – 1360 newborn. Subjects from Mumbai urban slums</p> <p>Intervention started more than 90 days before pregnancy till delivery.</p> | <p>Non-blinded, individually randomized controlled trial</p> <p>Intervention group received daily snack – ‘samosa’ made from green leafy vegetables, fruit, and milk. Control group received a daily low-micronutrient vegetable snack (potato and onion)</p> <p>Outcome assessment (Oral glucose tolerance test at 28</p> | <p>Risk of Gestational diabetes (GDM)</p>                                                    | <p>Prevalence of GDM was reduced in the treatment group (7.3% compared with 12.4% in controls</p>                                                                                                                                                                                                                                        |



|   |                                                                                                                                                                                                                     |                                                                                                                                                                                                                                                    |                                                                                                                                                                                                                                                                                                                                                                                                                                                                                                                                           |                                                                                                                     |                                                                                                                           |
|---|---------------------------------------------------------------------------------------------------------------------------------------------------------------------------------------------------------------------|----------------------------------------------------------------------------------------------------------------------------------------------------------------------------------------------------------------------------------------------------|-------------------------------------------------------------------------------------------------------------------------------------------------------------------------------------------------------------------------------------------------------------------------------------------------------------------------------------------------------------------------------------------------------------------------------------------------------------------------------------------------------------------------------------------|---------------------------------------------------------------------------------------------------------------------|---------------------------------------------------------------------------------------------------------------------------|
|   |                                                                                                                                                                                                                     |                                                                                                                                                                                                                                                    | wk) available in 1008 women.                                                                                                                                                                                                                                                                                                                                                                                                                                                                                                              |                                                                                                                     |                                                                                                                           |
| 5 | <p>Effect of a micronutrient-rich snack taken pre conceptionally and throughout pregnancy on ultrasound measures of fetal growth: The Mumbai Maternal Nutrition Project (MMNP)</p> <p>Lawande et al., 2018 (46)</p> | <p>Preconceptional intervention</p> <p>Total randomized women 6512, live births – 1962, outcome measurements on – 1360 newborn. Subjects from Mumbai urban slums</p> <p>Intervention started more than 90 days before pregnancy till delivery.</p> | <p>Non-blinded, individually randomized controlled trial</p> <p>Intervention group received daily snack – ‘samosa’ made from green leafy vegetables, fruit, and milk. Control group received a daily low-micronutrient vegetable snack (potato and onion)</p> <p>Outcome measurements:<br/>Fetal ultrasound(n=1677)<br/>1st trimester: foetal crown-rump length (9-12 weeks)<br/>Measurements in 2nd and 3rd trimester: head circumference, biparietal diameter, femur length, and abdominal circumference (19-20 weeks; 28-30 weeks)</p> | <p>Ultrasound measures of fetal size</p>                                                                            | <p>Intervention had no effect on fetal size or growth at any stage of pregnancy</p>                                       |
| 6 | <p>Effects of maternal vitamin B12 supplementation on early infant neurocognitive outcomes: a randomized controlled clinical trial.</p>                                                                             | <p>Maternal B12 supplementation status and vitamin B12, red cell folate and homocysteine concentrations at 12, 28 and 33 weeks gestation.</p>                                                                                                      | <p>Randomized, placebo-controlled clinical trial of oral B12 supplementation (50 µg) beginning at &lt;14 weeks of gestation till 6-week post-partum in 183</p>                                                                                                                                                                                                                                                                                                                                                                            | <p>Cognitive development in infants at 9 months of age on domains of cognitive, language and motor development.</p> | <p>No difference in cognitive outcomes between intervention groups. Higher Maternal homocysteine during pregnancy was</p> |

|  |                                                                                                                                                                              |                                                                                                                                               |                                                                                                                                                                                                                                          |                                                                                                                      |                                                                                                                                                                                                                                                                                                       |
|--|------------------------------------------------------------------------------------------------------------------------------------------------------------------------------|-----------------------------------------------------------------------------------------------------------------------------------------------|------------------------------------------------------------------------------------------------------------------------------------------------------------------------------------------------------------------------------------------|----------------------------------------------------------------------------------------------------------------------|-------------------------------------------------------------------------------------------------------------------------------------------------------------------------------------------------------------------------------------------------------------------------------------------------------|
|  | Srinivasan et al., 2017 (61)                                                                                                                                                 |                                                                                                                                               | <p>pregnant women in each group</p> <p>Outcome measurements in 178 offspring</p>                                                                                                                                                         |                                                                                                                      | <p>associated with poorer expressive language and fine motor functions at 9 months of age. (strongest association for homocysteine in second trimester with expressive language, B=-3.13 adjusted for birth weight, treatment group, income, home environment, parity)</p>                            |
|  | <p>Effect of Maternal Vitamin B12 Supplementation on Cognitive Outcomes in South Indian Children: A Randomized Controlled Clinical Trial</p> <p>Thomas et al., 2019 (60)</p> | <p>Maternal B12 supplementation status and vitamin B12, red cell folate and homocysteine concentrations at 12, 28 and 33 weeks gestation.</p> | <p>Randomized, placebo-controlled clinical trial of oral B12 supplementation (50 µg) beginning at &lt;14 weeks of gestation till 6-week post-partum in 183 pregnant women in each group</p> <p>Outcome measurements in 218 offspring</p> | <p>Cognitive development in infants at 30 months of age on domains of cognitive, language and motor development.</p> | <p>Children of mothers who received oral vitamin B12 supplementation had significantly higher scores on expressive language (B=0.14)</p> <p>Maternal homocysteine in second and third trimester continued to be associated negatively with expressive language scores even at 30 months (B=-0.18)</p> |

**Supplementary Table 9 – Gene polymorphisms and associations with outcomes**

| <b>Gene</b>                                                     | <b>Outcome</b>           | <b>Findings</b>                                                                                                                                                                                                                                                                              |
|-----------------------------------------------------------------|--------------------------|----------------------------------------------------------------------------------------------------------------------------------------------------------------------------------------------------------------------------------------------------------------------------------------------|
| MTHFR<br>Puri et al., 2013 (27)                                 | Recurrent pregnancy loss | MTHFR genotypic distribution among cases and controls showed no significant difference<br><br>MTHFR C677T polymorphism was found to be significantly associated with increased homocysteine in the case group                                                                                |
| MTHFR<br>Nair 2012 (68)                                         | Recurrent pregnancy loss | Homozygosity and heterozygosity for the MTHFR C677T polymorphism confer a 6.3- and 1.9-fold increased risk of idiopathic REPL, respectively.                                                                                                                                                 |
| MTHFR<br>Kaur et al., 2018 (28)                                 | Recurrent pregnancy loss | MTHFR 677T allele frequency was highest in non-anemic RPL women, who exhibited highest homocysteine levels with the highest B12/folate ratios. A higher allelic frequency for C677T allele was observed (0.16 versus 0.11) in the case group                                                 |
| MTHFR<br>Folate Hydrolase (GCP II)<br>Naushad & Devi, 2010 (69) | NTD                      | Maternal MTHFR C677T (OR=2.69) and parental GCP II C1561T polymorphisms (OR = 3.23) are associated with increased risk for NTDs<br><br>Both paternal and maternal GCP II T-variant alleles were found to interact with MTHFR 677T- and MTRR G-variant alleles in increasing the risk for NTD |
| MTHFR<br>Yajnik CS et al., 2014 (44)                            | Offspring birth weight   | Maternal risk genotype at rs1801133 predicted higher homocysteine concentration and lower birth weight (adjusted for gestational age, offspring gender and rs1801133 genotype)                                                                                                               |
| MTHFR gene polymorphism<br>Deb et al., 2011 (35)                | NTD                      | Muslim NTD mothers had higher TT genotype showing increased risk for neural tube defects (OR = 12.9 adjusted for mothers age, education economic status)                                                                                                                                     |

|                                                |     |                                                                                                                                                        |
|------------------------------------------------|-----|--------------------------------------------------------------------------------------------------------------------------------------------------------|
| MTHFR<br>TCN2<br><br>Godbole et al., 2011 (37) | NTD | 1298A>C and 1781G>A polymorphisms in MTHFR were protective<br><br>Maternal 776C>G polymorphism in TCN2 was strongly predictive of NTD in the offspring |
|------------------------------------------------|-----|--------------------------------------------------------------------------------------------------------------------------------------------------------|
